# Supplementary material
Source: Springer Nature journal article supplement (https://www.springermedizin.de/resource/supplementary/12936_2010_1389_MOESM3_ESM.pdf/9549682)

Transfusion %

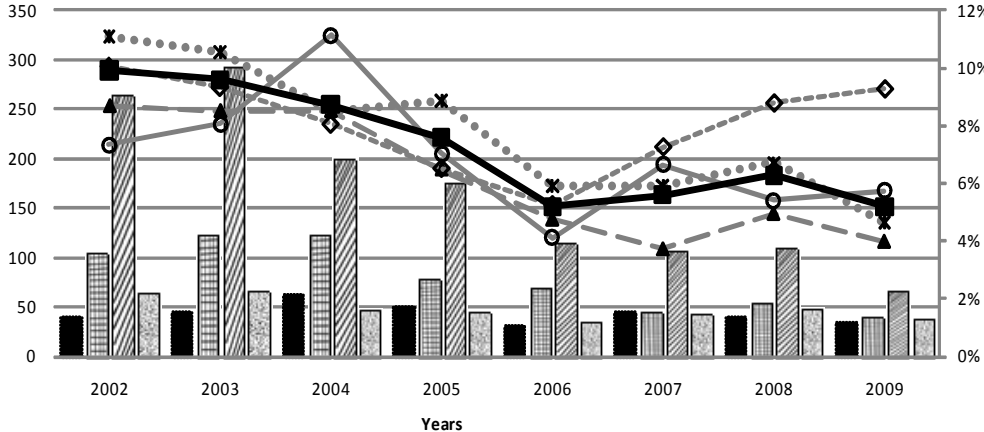

○ Neo %

▲ Infant %

● × ● 1-4 years %

◆ 5-13 years %

■ Total

Supplement: MOESM3 [file 9549682]
